# Supplementary material for: WRKY6 restricts Piriformospora indica-stimulated and phosphate-induced root development in Arabidopsis
Source: PubMed Central journal article supplement (PMC4697310; doi:10.1186/s12870-015-0673-4), 2015-12-30
Supplement: 12870_2015_673_MOESM2_ESM.pdf [file 12870_2015_673_MOESM2_ESM.pdf]

**WRKY6 restricts *Piriformospora indica*-stimulated root development in Arabidopsis under phosphate limitation**

**Identification of genes that optimize root growth and development**

**Madhunita Bakshi<sup>1</sup>, Khabat Vahabi<sup>1</sup>, Samik Bhattacharya<sup>2</sup>, Irena Sherameti<sup>1</sup>, Ajit Varma<sup>3</sup>, Kai-Wun Yeh<sup>4</sup>, Ian Baldwin<sup>2</sup>, Atul Kumar Johri<sup>5</sup>, and Ralf Oelmüller<sup>1\*</sup>**

<sup>1</sup>Institute of General Botany and Plant Physiology, Friedrich-Schiller-University Jena, Dornburgerstr. 159, D-07743 Jena, Germany

<sup>2</sup>Max-Planck-Institute for Chemical Ecology, Beutenberg Campus, Hans-Knöll-Straße 8, D-07745 Jena, Germany

<sup>3</sup>Amity Institute of Microbial Technology; AUUP; Noida, India

<sup>4</sup>Institute of Plant Biology, Taiwan National University, Taipei, Taiwan

<sup>5</sup>School of Life Sciences; Jawaharlal Nehru University, New Delhi-110067, India

**Additional file\_2**

**Table S2.** Genes which were regulated more than 2-fold ( $\log_2$  - value  $\geq 1$ ) in response to Pi limitation, *P. indica* and mutation of *WRKY6*.

| Mapman BinCode | Gene ID   | Gene Description                                                        | Pi limitation | <i>P. indica</i> | <i>wrky6</i> |
|----------------|-----------|-------------------------------------------------------------------------|---------------|------------------|--------------|
| 20.2.3         | At1g26850 | dehydration-responsive family protein                                   | 6.0           | 7.1              | 6.9          |
| 35.1.26        | At4g11540 | DC1 domain-containing protein, intracellular signaling                  | 5.9           | 7.0              | 6.9          |
| 35.2           | At4g08593 | unknown protein                                                         | 6.4           | 6.3              | 6.9          |
| 27.3.72        | At5g67480 | BT4 (BTB AND TAZ DOMAIN PROTEIN 4); transcription regulator             | 5.8           | 6.9              | 6.8          |
| 35.2           | At3g09975 | unknown protein                                                         | 6.6           | 6.7              | 5.9          |
| 35.2           | At5g46220 | unknown protein                                                         | 5.9           | 5.8              | 5.6          |
| 27.3.71        | At4g29160 | SNF7.1                                                                  | 5.6           | 5.9              | 5.8          |
| 26.21          | At4g33355 | lipid binding protein                                                   | 5.7           | 5.1              | 5.8          |
| 21.4           | At4g08550 | electron carrier/ protein disulfide oxidoreductase                      | 5.5           | 5.4              | 5.1          |
| 35.2           | At3g45880 | 2-oxoglutarate (2OG) and Fe(II)-dependent oxygenase superfamily protein | 5.8           | 5.8              | 4.2          |
| 30.3           | At1g32250 | calmodulin, putative                                                    | 5.4           | 5.3              | 5.1          |
| 29.5           | At5g09640 | SCPL19; serine-type carboxypeptidase / sinapoyltransferase              | 4.8           | 5.6              | 4.8          |
| 35.1           | At2g01790 | meprin and TRAF homology domain-containing protein                      | 5.1           | 5.1              | 5.0          |
| 27.3.41        | At3g46770 | transcriptional factor B3 family protein                                | 2.2           | 6.4              | 6.4          |
| 27.3.11        | At1g51220 | zinc finger (C2H2 type) protein (WIP5)                                  | 4.8           | 5.3              | 4.7          |
| 35.2           | At2g18200 | unknown protein                                                         | 5.1           | 4.9              | 4.8          |
| 27.3.24        | At1g65360 | AGL23 (AGAMOUS-LIKE 23); transcription factor                           | 4.9           | 5.1              | 4.5          |
| 29.5.11.4.3.2  | At5g44980 | F-box family protein                                                    | 6.6           | 3.5              | 4.4          |
| 27.3.67        | At5g27140 | SAR DNA-binding protein, putative                                       | 3.0           | 5.9              | 5.4          |
| 27.2           | At1g30455 | transcription factor                                                    | 4.6           | 5.1              | 4.5          |
| 33.99          | At5g62850 | AtVEX1 (VEGETATIVE CELL EXPRESSED1), SWEET5                             | 4.7           | 4.7              | 4.7          |
| 35.2           | At4g27930 | unknown protein                                                         | 4.5           | 4.7              | 4.7          |
| 17.2.3         | At4g34780 | auxin-responsive family protein                                         | 4.8           | 4.0              | 4.9          |
| 27.4           | At5g53720 | RNA recognition motif (RRM)-containing protein                          | 4.4           | 4.5              | 4.5          |
| 29.4           | At1g43895 | pseudogene, protein kinase -related protein                             | 4.2           | 4.5              | 4.5          |
| 27.3.99        | At2g26135 | zinc finger (C3HC4-type RING finger) family protein                     | 4.6           | 4.0              | 4.6          |
| 10.8.1         | At1g69940 | PPME1; pectinesterase                                                   | 4.3           | 4.1              | 4.5          |
| 26.8           | At1g01980 | SEC1A                                                                   | 4.2           | 4.3              | 4.3          |
| 35.2           | At4g25990 | CIL, chloroplast import apparatus CIA2-like protein                     | 4.4           | 4.4              | 3.8          |

|               |           |                                                                            |     |     |     |
|---------------|-----------|----------------------------------------------------------------------------|-----|-----|-----|
| 35.1.12       | At5g56510 | APUM12 (ARABIDOPSIS PUMILIO 12); RNA binding protein                       | 3.0 | 5.0 | 4.6 |
| 35.2          | At3g43572 | unknown protein                                                            | 5.9 | 2.4 | 4.1 |
| 35.2          | At3g59620 | unknown protein                                                            | 3.6 | 4.3 | 4.6 |
| 21.1          | At2g33270 | ACHT3 (ATYPICAL CYS HIS RICH THIOREDOXIN 3)                                | 4.7 | 3.6 | 4.0 |
| 20.1.7        | At3g48231 | LCR48 (Low-molecular-weight cysteine-rich 48)                              | 3.9 | 4.1 | 4.2 |
| 35.2          | At3g50376 | pseudogene of NLI interacting factor (NIF) family protein                  | 4.1 | 4.2 | 3.9 |
| 35.2          | At1g55221 | pseudogene                                                                 | 4.6 | 3.6 | 3.3 |
| 31.4          | At1g07725 | ATEXO70H6 (exocyst subunit EXO70 family protein H6)                        | 3.7 | 3.9 | 3.5 |
| 35.2          | At2g17305 | unknown protein                                                            | 3.8 | 3.9 | 3.4 |
| 35.2          | At4g29200 | beta-galactosidase                                                         | 3.5 | 3.8 | 3.9 |
| 33.99         | At5g07930 | MCT2 (mei2 C-Terminal RRM only like 2); nucleic acid binding protein       | 4.2 | 2.8 | 4.2 |
| 35.2          | At5g45690 | unknown protein                                                            | 4.0 | 4.2 | 2.9 |
| 35.1          | At4g33820 | glycosyl hydrolase family 10 protein                                       | 4.2 | 4.4 | 2.5 |
| 27.3.24       | At5g51860 | MADS-box protein (AGL72)                                                   | 3.9 | 3.9 | 3.2 |
| 27.3.7        | At3g21880 | zinc finger (B-box type) family protein                                    | 3.5 | 3.7 | 3.8 |
| 35.2          | At1g24256 | unknown protein                                                            | 2.4 | 3.9 | 4.6 |
| 30.2.17       | At4g11890 | protein kinase family protein                                              | 1.7 | 4.5 | 4.5 |
| 35.2          | At5g28295 | unknown protein                                                            | 3.6 | 3.4 | 3.5 |
| 35.1          | At3g57840 | self-incompatibility protein-related                                       | 3.1 | 3.7 | 3.6 |
| 20.1          | At2g15040 | ATRLP18, RECEPTOR LIKE PROTEIN 18, RLP18                                   | 4.4 | 2.2 | 3.7 |
| 29.5.11.4.3.2 | At5g53840 | F-box family protein (FBL13)                                               | 3.4 | 3.4 | 3.4 |
| 35.2          | At2g11440 | pseudogene                                                                 | 3.6 | 3.6 | 3.0 |
| 35.1          | At3g48620 | unknown protein; located in outer membrane                                 | 3.7 | 2.7 | 3.7 |
| 29.3.4.1      | At2g38960 | AERO2 (Arabidopsis endoplasmic reticulum oxidoreductins 2)                 | 4.0 | 2.3 | 3.4 |
| 35.1          | At4g26860 | pyridoxal phosphate binding                                                | 3.7 | 2.9 | 3.1 |
| 29.5.11.4.3.2 | At5g44220 | F-box family protein                                                       | 3.7 | 2.3 | 3.7 |
| 20.1.7        | At4g09984 | LCR34 (Low-molecular-weight cysteine-rich 34)                              | 3.2 | 3.3 | 3.2 |
| 27.1          | At5g03580 | polyadenylate-binding protein, putative                                    | 3.4 | 3.4 | 2.9 |
| 35.2          | At4g08022 | pseudogene, hypothetical protein                                           | 3.4 | 3.4 | 2.8 |
| 35.2          | At4g05018 | unknown protein                                                            | 3.7 | 3.1 | 2.7 |
| 33.99         | At1g21890 | nodulin MtN21 family protein                                               | 2.9 | 3.0 | 3.5 |
| 35.2          | At1g23910 | unknown protein; involved in response to biotic stimulus, defense response | 3.0 | 3.6 | 2.9 |
| 24            | At5g16080 | AtCXE17 (Arabidopsis thaliana carboxyesterase 17)                          | 3.5 | 2.9 | 3.0 |

|           |           |                                                             |     |     |     |
|-----------|-----------|-------------------------------------------------------------|-----|-----|-----|
| 35.2      | At5g51090 | unknown protein                                             | 3.3 | 2.9 | 3.2 |
| 33.99     | At2g30300 | nodulin-related protein                                     | 3.2 | 3.0 | 3.0 |
| 33.99     | At2g37860 | LCD1 (LOWER CELL DENSITY 1)                                 | 3.0 | 3.3 | 2.9 |
| 26.4.1    | At3g24330 | glycosyl hydrolase family 17 protein                        | 2.9 | 3.0 | 3.1 |
| 35.1      | At3g48209 | thionin family protein                                      | 3.0 | 3.0 | 2.8 |
| 20.1.7.12 | At4g14272 | defensin-like (DEFL) family protein                         | 3.1 | 2.9 | 2.7 |
| 35.1.19   | At1g48590 | C2 domain-containing protein                                | 3.8 | 3.5 | 1.5 |
| 10.8.1    | At1g11590 | pectin methylesterase, putative                             | 2.9 | 2.9 | 2.8 |
| 29.5.11.1 | At5g48700 | ubiquitin-related                                           | 2.5 | 3.4 | 2.6 |
| 35.2      | At3g30520 | unknown protein                                             | 2.8 | 2.8 | 2.8 |
| 11.1.8    | At1g21540 | AMP-dependent synthetase and ligase family protein          | 3.0 | 2.7 | 2.4 |
| 35.2      | At3g43829 | unknown protein                                             | 4.0 | 2.1 | 2.1 |
| 35.2      | At5g29044 | unknown protein                                             | 3.8 | 2.2 | 2.1 |
| 35.1      | At3g58290 | meprin and TRAF homology domain-containing protein          | 2.7 | 3.0 | 2.4 |
| 35.2      | At5g35890 | beta-galactosidase                                          | 3.8 | 1.5 | 2.5 |
| 35.2      | At1g57906 | unknown protein                                             | 2.7 | 2.4 | 2.8 |
| 26.3.2    | At4g38590 | glycosyl hydrolase family 35 protein                        | 2.9 | 2.4 | 2.5 |
| 30.2.9    | At1g24650 | leucine-rich repeat family protein                          | 2.3 | 2.6 | 2.9 |
| 27.3.24   | At2g24840 | AGL61 (AGAMOUS-LIKE 61); transcription factor               | 2.6 | 2.8 | 2.3 |
| 35.2      | At3g42140 | nucleic acid binding / zinc ion binding                     | 2.4 | 1.8 | 3.5 |
| 35.1.41   | At1g30795 | hydroxyproline-rich glycoprotein family protein             | 2.9 | 2.4 | 2.3 |
| 35.2      | At1g26350 | unknown protein                                             | 3.4 | 1.2 | 3.0 |
| 29.5.7    | At3g59990 | MAP2B (METHIONINE AMINOPEPTIDASE 2B)                        | 2.6 | 2.4 | 2.7 |
| 27.3.37   | At1g67100 | LBD40 (LOB DOMAIN-CONTAINING PROTEIN 40)                    | 1.7 | 4.4 | 1.4 |
| 16.2      | At1g32910 | transferase family protein                                  | 2.8 | 2.0 | 2.6 |
| 26.10     | At4g15310 | CYP702A3; monooxygenase                                     | 1.4 | 3.5 | 2.6 |
| 27.3.67   | At1g61320 | unknown protein                                             | 2.4 | 2.2 | 2.8 |
| 35.2      | At5g50360 | unknown protein                                             | 2.1 | 2.5 | 2.8 |
| 35.2      | At1g03240 | unknown protein                                             | 2.5 | 2.5 | 2.3 |
| 35.1      | At4g19910 | Toll-Interleukin-Resistance (TIR) domain-containing protein | 2.8 | 2.3 | 2.2 |
| 35.1      | At3g06880 | nucleotide binding protein                                  | 3.0 | 2.1 | 2.2 |
| 20.1.7    | At5g42797 | LCR28 (Low-molecular-weight cysteine-rich 28)               | 3.8 | 2.0 | 1.4 |
| 29.5.5    | At3g52000 | scpl36 (serine carboxypeptidase-like 36)                    | 2.5 | 2.6 | 2.0 |
| 35.1      | At5g52690 | heavy-metal-associated domain-containing protein            | 2.4 | 2.4 | 2.2 |
| 26.10     | At1g19630 | CYP722A1; monooxygenase                                     | 2.5 | 2.5 | 1.9 |

|               |           |                                                           |     |     |     |
|---------------|-----------|-----------------------------------------------------------|-----|-----|-----|
| 35.2          | At1g77655 | unknown protein                                           | 3.0 | 1.9 | 2.1 |
| 33.99         | At1g23240 | caleosin-related family protein                           | 1.1 | 2.9 | 2.9 |
| 35.2          | At3g58300 | unknown protein                                           | 2.3 | 2.3 | 2.3 |
| 28.1          | At2g02650 | reverse transcriptase-related protein                     | 4.0 | 1.1 | 1.6 |
| 35.1          | At1g68630 | unknown protein                                           | 2.7 | 2.1 | 1.9 |
| 35.2          | At3g43950 | phosphotransferase, alcohol group as acceptor             | 2.2 | 2.3 | 2.1 |
| 29.2.1.2.2.30 | At1g22110 | structural constituent of ribosome                        | 3.5 | 1.6 | 1.4 |
| 35.2          | At5g05113 | unknown protein                                           | 3.7 | 1.3 | 1.5 |
| 33.1          | At1g03890 | cupin family protein                                      | 2.1 | 2.5 | 1.8 |
| 27.3.6        | At1g06170 | basic helix-loop-helix (bHLH) family protein              | 1.8 | 2.3 | 2.3 |
| 35.2          | At1g68600 | unknown protein                                           | 2.3 | 1.9 | 2.1 |
| 20.2.3        | At3g06760 | response to water deprivation                             | 2.2 | 1.8 | 2.4 |
| 34.2          | At1g34580 | carbohydrate transmembrane transporter                    | 2.5 | 1.8 | 2.0 |
| 26.4.1        | At3g57260 | BGL2 (BETA-1,3-GLUCANASE 2); cellulase                    | 1.4 | 3.3 | 1.6 |
| 35.2          | At1g53285 | unknown protein                                           | 2.3 | 2.3 | 1.8 |
| 35.1          | At1g21928 | thionin family protein                                    | 2.2 | 2.2 | 1.8 |
| 35.2          | At3g27025 | unknown protein                                           | 3.2 | 1.5 | 1.5 |
| 27.4          | At1g67950 | RNA recognition motif (RRM)-containing protein            | 2.4 | 2.3 | 1.5 |
| 35.1          | At5g14980 | esterase/lipase/thioesterase family protein               | 2.7 | 2.0 | 1.4 |
| 35.1          | At1g31390 | meprin and TRAF homology domain-containing protein        | 2.4 | 1.4 | 2.4 |
| 35.2          | At4g10860 | unknown protein                                           | 1.8 | 3.0 | 1.3 |
| 29.3.4.3      | At3g13205 | pseudogene of vacuolar protein sorting-associated protein | 1.9 | 2.1 | 2.1 |
| 20.1.7.12     | At1g33607 | defensin-like (DEFL) family protein                       | 1.5 | 2.2 | 2.5 |
| 35.2          | At2g20625 | unknown protein                                           | 2.5 | 2.2 | 1.4 |
| 29.3.4.99     | At5g27220 | protein transport protein-related                         | 2.1 | 2.1 | 1.9 |
| 35.2          | At1g04501 | unknown protein                                           | 2.0 | 2.0 | 2.0 |
| 27.1          | At1g61275 | U12; snRNA                                                | 1.5 | 2.2 | 2.3 |
| 27.3.3        | At5g25390 | SHN2 (shine2); transcription factor                       | 2.1 | 2.0 | 1.9 |
| 10.2.1        | At4g23990 | ATCSLG3; cellulose synthase                               | 1.6 | 2.5 | 1.8 |
| 10.7          | At5g39280 | ATEXPA23 (EXPANSIN A23)                                   | 2.2 | 1.6 | 2.2 |
| 32            | At2g19425 | MIR156G; miRNA                                            | 2.4 | 1.9 | 1.6 |
| 26.3.4        | At4g39000 | AtGH9B17 (Arabidopsis thaliana glycosyl hydrolase 9B17)   | 2.3 | 1.5 | 2.1 |
| 30.3          | At2g41860 | CPK14; calmodulin-dependent protein kinase                | 2.0 | 2.0 | 2.0 |
| 35.2          | At1g42710 | unknown protein                                           | 1.1 | 2.5 | 2.3 |
| 34.7          | At4g08878 | inorganic phosphate transporter                           | 1.9 | 2.0 | 1.9 |

|               |           |                                                                                                   |     |     |     |
|---------------|-----------|---------------------------------------------------------------------------------------------------|-----|-----|-----|
| 27.3.24       | At5g39810 | AGL98 (AGAMOUS-LIKE 98); transcription factor                                                     | 2.5 | 1.3 | 2.0 |
| 29.5.11.4.3.2 | At3g22650 | CEG (CEGENDUO)                                                                                    | 1.1 | 2.3 | 2.4 |
| 35.1          | At3g46190 | meprin and TRAF homology domain-containing protein                                                | 1.3 | 3.1 | 1.4 |
| 35.2          | At1g28375 | unknown protein                                                                                   | 1.9 | 1.9 | 1.9 |
| 26.2          | At3g02100 | UDP-glucuronosyl/UDP-glucosyl transferase family protein                                          | 2.3 | 2.2 | 1.1 |
| 31.1          | At4g27360 | dynein light chain, putative                                                                      | 2.3 | 1.3 | 2.0 |
| 35.2          | At3g24640 | lyase                                                                                             | 3.1 | 1.2 | 1.2 |
| 35.2          | At5g65166 | unknown protein                                                                                   | 2.8 | 1.4 | 1.2 |
| 35.2          | At1g79770 | unknown protein                                                                                   | 1.8 | 1.9 | 1.7 |
| 35.2          | At4g14260 | unknown protein                                                                                   | 2.1 | 1.6 | 1.8 |
| 31.2          | At2g36250 | FTSZ2-1; protein binding protein; structural molecule                                             | 3.0 | 1.0 | 1.4 |
| 27.1          | At2g43810 | small nuclear ribonucleoprotein F, putative / U6 snRNA-associated Sm-like protein, putative       | 1.9 | 2.1 | 1.3 |
| 27.3.55       | At5g61070 | HDA18; H3/H4 histone acetyltransferase/ histone deacetylase                                       | 1.9 | 1.7 | 1.8 |
| 29.2.7.1.2    | At4g31075 | pre-tRNA                                                                                          | 1.2 | 2.1 | 2.1 |
| 35.1.5        | At4g01400 | unknown protein                                                                                   | 1.7 | 1.9 | 1.6 |
| 17.8.1        | At4g26420 | GAMT1; S-adenosylmethionine-dependent methyltransferase/ gibberellin carboxyl-O-methyltransferase | 2.0 | 1.4 | 1.9 |
| 26.18         | At1g54980 | invertase/pectin methylesterase inhibitor family protein                                          | 2.0 | 1.6 | 1.6 |
| 35.2          | At1g32670 | unknown protein                                                                                   | 2.0 | 2.0 | 1.2 |
| 35.2          | At1g54880 | unknown protein                                                                                   | 1.7 | 1.7 | 1.7 |
| 30.5          | At5g54840 | SGP1; GTP binding protein                                                                         | 1.7 | 1.8 | 1.7 |
| 35.1          | At4g14730 | LIFEGUARD 1, Bax inhibitor-1 family protein                                                       | 2.4 | 1.0 | 1.7 |
| 32            | At3g55734 | MIR393B; miRNA                                                                                    | 1.8 | 2.0 | 1.4 |
| 4.3.8         | At3g43290 | unknown protein                                                                                   | 1.7 | 1.7 | 1.7 |
| 35.2          | At4g06490 | unknown protein                                                                                   | 2.1 | 1.2 | 1.7 |
| 26.28         | At5g15720 | GLIP7; carboxylesterase/ lipase                                                                   | 2.3 | 1.4 | 1.4 |
| 26.21         | At1g64235 | protease inhibitor/seed storage/lipid transfer protein (LTP) family protein                       | 2.2 | 1.3 | 1.6 |
| 26.10         | At4g15440 | HPL1 (HYDROPEROXIDE LYASE 1)                                                                      | 2.1 | 1.5 | 1.4 |
| 34.16         | At2g29940 | PDR3 (PLEIOTROPIC DRUG RESISTANCE 3); ATPase, coupled to transmembrane movement of substances     | 2.2 | 1.0 | 1.7 |
| 35.2          | At2g14405 | pseudogene                                                                                        | 1.8 | 1.6 | 1.6 |
| 34.99         | At3g03620 | MATE efflux family protein                                                                        | 2.1 | 1.5 | 1.4 |
| 35.1.25       | At1g24220 | paired amphipathic helix repeat-containing protein                                                | 1.9 | 1.1 | 2.0 |

|               |           |                                                                                  |     |     |     |
|---------------|-----------|----------------------------------------------------------------------------------|-----|-----|-----|
| 29.4          | At1g01450 | protein kinase-related                                                           | 1.6 | 1.2 | 2.1 |
| 16.2          | At2g19070 | SHT (SPERMIDINE HYDROXYCINNAMOYL TRANSFERASE)                                    | 1.9 | 1.1 | 1.9 |
| 29.5.11.4.3.2 | At3g46050 | kelch repeat-containing F-box family protein                                     | 1.8 | 1.6 | 1.4 |
| 35.2          | At3g26235 | unknown protein                                                                  | 2.0 | 1.3 | 1.5 |
| 26.3          | At2g04060 | beta-galactosidase, putative                                                     | 1.8 | 1.2 | 1.8 |
| 35.2          | At5g24060 | unknown protein                                                                  | 1.2 | 1.8 | 1.8 |
| 30.2.17       | At4g28670 | protein kinase family protein                                                    | 1.7 | 1.5 | 1.6 |
| 10.8.1        | At3g27980 | pectinesterase family protein                                                    | 1.8 | 1.8 | 1.2 |
| 29.5.11.4.3.2 | At4g11770 | kelch repeat-containing F-box family protein                                     | 1.9 | 1.7 | 1.2 |
| 10.2.1        | At2g25540 | CESA10; cellulose synthase 10                                                    | 1.8 | 1.4 | 1.5 |
| 29.2.7.1.2    | At4g34035 | pre-tRNA                                                                         | 2.1 | 1.1 | 1.5 |
| 26.10         | At3g26270 | CYP71B25; monooxygenase                                                          | 1.8 | 1.3 | 1.6 |
| 35.1          | At1g47880 | pseudogene, similar to NLOE, similar to disease resistance protein               | 1.6 | 1.6 | 1.5 |
| 35.2          | At1g68380 | unknown protein                                                                  | 1.9 | 1.5 | 1.3 |
| 35.2          | At2g10920 | unknown protein                                                                  | 1.5 | 1.5 | 1.6 |
| 31.1          | At4g03450 | ankyrin repeat family protein                                                    | 1.7 | 1.9 | 1.0 |
| 17.6.1.11     | At5g07200 | YAP169; gibberellin 20-oxidase                                                   | 2.3 | 1.2 | 1.1 |
| 16.5.1.3.2.1  | At1g54040 | ESP (EPITHIOSPECIFIER PROTEIN); enzyme regulator                                 | 1.6 | 1.3 | 1.7 |
| 27.3.41       | At4g31610 | REM1 (REPRODUCTIVE MERISTEM 1); transcription factor                             | 1.8 | 1.2 | 1.5 |
| 27.3.37       | At1g65620 | AS2 (ASYMMETRIC LEAVES 2)                                                        | 1.5 | 2.0 | 1.0 |
| 20.1.7.12     | At2g42885 | defensin-like (DEFL) family protein                                              | 1.6 | 1.3 | 1.6 |
| 29.5.11.4.3.2 | At3g25460 | F-box family protein                                                             | 1.6 | 1.1 | 1.8 |
| 28.1          | At2g42320 | nucleolar protein gar2-related protein                                           | 2.2 | 1.1 | 1.2 |
| 20.1.7.12     | At5g44430 | PDF1.2c (plant defensin 1.2c)                                                    | 1.7 | 1.7 | 1.1 |
| 17.7.1.10     | At1g19640 | JMT (JASMONIC ACID CARBOXYL METHYLTRANSFERASE);<br>jasmonate O-methyltransferase | 1.9 | 1.1 | 1.4 |
| 29.5.3        | At5g28235 | Ulp1 protease family protein                                                     | 1.6 | 1.2 | 1.6 |
| 29.2.2.50     | At2g06822 | unknown protein                                                                  | 1.9 | 1.4 | 1.1 |
| 27.3.3        | At1g12890 | AP2 domain-containing transcription factor, putative                             | 1.5 | 1.6 | 1.4 |
| 27.3.30       | At1g11850 | unknown protein                                                                  | 1.4 | 1.5 | 1.5 |
| 35.1          | At3g52620 | unknown protein                                                                  | 1.4 | 1.5 | 1.5 |
| 27.3.25       | At2g32460 | MYB101                                                                           | 1.4 | 2.0 | 1.1 |
| 35.2          | At5g54067 | unknown protein                                                                  | 1.4 | 1.5 | 1.4 |
| 27.3.24       | At3g61120 | AGL13 (AGAMOUS-LIKE 13); transcription factor                                    | 1.8 | 1.2 | 1.3 |
| 29.5.11.4.3.2 | At3g17560 | F-box family protein                                                             | 1.3 | 1.3 | 1.7 |

|               |           |                                                                                                                      |     |     |     |
|---------------|-----------|----------------------------------------------------------------------------------------------------------------------|-----|-----|-----|
| 35.2          | At1g34392 | unknown protein                                                                                                      | 1.4 | 1.5 | 1.3 |
| 27.3.32       | At1g55600 | WRKY10                                                                                                               | 1.3 | 1.5 | 1.4 |
| 35.1          | At2g31005 | cysteine-rich peptide family protein                                                                                 | 1.5 | 1.6 | 1.2 |
| 29.5.11.4.3.2 | At1g55070 | F-box family protein                                                                                                 | 1.7 | 1.2 | 1.3 |
| 35.2          | At3g45460 | zinc ion binding protein                                                                                             | 1.7 | 1.3 | 1.3 |
| 35.2          | At1g23074 | unknown protein                                                                                                      | 1.7 | 1.2 | 1.3 |
| 26.13         | At1g56360 | PAP6 (PURPLE ACID PHOSPHATASE 6)                                                                                     | 1.9 | 1.1 | 1.3 |
| 29.5.11.4.3.2 | At1g16940 | F-box family protein                                                                                                 | 1.4 | 1.7 | 1.1 |
| 35.1.19       | At1g20080 | SYNAPTOTAGMIN 2                                                                                                      | 2.0 | 1.0 | 1.1 |
| 35.1.42       | At3g51290 | proline-rich family protein                                                                                          | 1.7 | 1.0 | 1.4 |
| 31.3          | At4g30820 | cyclin-dependent kinase-activating kinase assembly factor-related /<br>CDK-activating kinase assembly factor-related | 1.5 | 1.5 | 1.1 |
| 31.2          | At1g19810 | putative cell division control protein                                                                               | 1.6 | 1.0 | 1.4 |
| 27.3.99       | At5g45113 | mitochondrial transcription termination factor-related protein                                                       | 1.4 | 1.4 | 1.2 |
| 20.2          | At2g45130 | SPX3 (SPX DOMAIN GENE 3)                                                                                             | 1.8 | 1.0 | 1.1 |
| 27.3.67       | At1g75560 | zinc knuckle (CCHC-type) family protein                                                                              | 1.0 | 1.7 | 1.2 |
| 27.3.83       | At3g52910 | AtGRF4 (GROWTH-REGULATING FACTOR 4)                                                                                  | 1.3 | 1.4 | 1.2 |
| 8.1.7         | At5g09600 | SDH3-1; succinate dehydrogenase                                                                                      | 1.2 | 1.3 | 1.3 |
| 35.2          | At5g64541 | unknown protein                                                                                                      | 1.4 | 1.3 | 1.1 |
| 35.1          | At5g63225 | glycosyl hydrolase family protein 17                                                                                 | 1.3 | 1.1 | 1.3 |
| 35.1          | At1g24147 | unknown protein                                                                                                      | 1.3 | 1.1 | 1.4 |
| 26.11.1       | At1g09510 | cinnamyl-alcohol dehydrogenase family / CAD family                                                                   | 1.3 | 1.3 | 1.0 |
| 26.28         | At2g04570 | GDSL-motif lipase/hydrolase family protein                                                                           | 1.3 | 1.4 | 1.1 |
| 29.5.11.4.2   | At1g68940 | armadillo/beta-catenin repeat protein / U-box domain-containing<br>protein                                           | 1.2 | 1.2 | 1.2 |
| 35.2          | At2g19000 | unknown protein; located in endomembrane system                                                                      | 1.1 | 1.1 | 1.5 |
| 35.2          | At2g16668 | unknown protein                                                                                                      | 1.4 | 1.2 | 1.0 |
| 29.2.3        | At5g01940 | eukaryotic translation initiation factor 2B family protein                                                           | 1.5 | 1.0 | 1.1 |
| 35.2          | At3g20720 | unknown protein                                                                                                      | 1.4 | 1.1 | 1.1 |
| 35.1          | At4g12890 | gamma interferon responsive lysosomal thiol reductase family protein                                                 | 1.3 | 1.2 | 1.0 |
| 35.2          | At4g33380 | unknown protein                                                                                                      | 1.1 | 1.2 | 1.1 |
| 35.2          | At5g26730 | unknown protein, located in mitochondrion                                                                            | 1.2 | 1.0 | 1.2 |
| 29.5.11.4.3.2 | At5g40680 | kelch repeat-containing F-box family protein                                                                         | 1.1 | 1.1 | 1.2 |
| 35.2          | At2g41600 | unknown protein; located in mitochondrial matrix                                                                     | 1.2 | 1.1 | 1.0 |
| 27.4          | At5g24440 | CID13 (CTC-Interacting Domain 13)                                                                                    | 1.0 | 1.1 | 1.1 |



|           |           |                                                          |      |      |      |
|-----------|-----------|----------------------------------------------------------|------|------|------|
| 35.2      | At1g22651 | unknown protein                                          | 1.0  | 1.0  | 1.1  |
| 35.1.12   | At5g09610 | APUM21 (Arabidopsis Pumilio 21); RNA binding protein     | 1.0  | 1.0  | 1.0  |
| 32        | At1g26975 | MIR395B; miRNA                                           | 1.0  | 1.0  | 1.0  |
| 20.1      | At1g31580 | ECS1, CXC750                                             | -1.1 | -1.0 | -1.3 |
| 29.3.4.3  | At4g06498 | pseudogene, vacuolar sorting receptor -related           | -1.1 | -1.2 | -1.1 |
| 30.4      | At3g59770 | SAC9; inositol or phosphatidylinositol phosphatase       | -1.2 | -1.1 | -1.1 |
| 31.1      | At4g25590 | ADF7 (actin depolymerizing factor 7)                     | -1.3 | -1.2 | -1.1 |
| 35.2      | At1g26720 | unknown protein                                          | -1.3 | -1.2 | -1.2 |
| 35.2      | At2g15327 | unknown protein                                          | -1.2 | -1.4 | -1.0 |
| 35.2      | At2g13550 | unknown protein                                          | -1.7 | -1.1 | -1.0 |
| 1.1.1.1   | At2g40100 | LHCB4.3 (light harvesting complex of photosystem II)     | -1.2 | -1.1 | -1.5 |
| 27.3.16   | At5g50490 | NF-YC5 (NUCLEAR FACTOR Y, SUBUNIT C5)                    | -1.2 | -1.3 | -1.4 |
| 35.2      | At4g11930 | unknown protein                                          | -1.6 | -1.2 | -1.3 |
| 35.2      | At1g47980 | unknown protein                                          | -1.2 | -1.5 | -1.5 |
| 27.3.57   | At1g30810 | transcription factor                                     | -1.7 | -1.2 | -1.5 |
| 35.2      | At1g54600 | pseudogene, hypothetical protein                         | -1.0 | -2.3 | -1.1 |
| 33.99     | At1g24520 | BCP1   BCP1                                              | -1.8 | -1.8 | -1.1 |
| 10.8.1    | At2g47040 | VGD1 (VANGUARD1)                                         | -1.3 | -2.4 | -1.0 |
| 35.1      | At5g08000 | E13L3, PDCB2                                             | -1.5 | -2.2 | -1.1 |
| 27.1      | At3g14735 | U6-1; snRNA                                              | -1.8 | -1.7 | -1.3 |
| 27.3.24   | At1g28460 | Symbols: AGL59   AGL59 (AGAMOUS-LIKE 59)                 | -1.1 | -1.7 | -2.0 |
| 35.2      | At1g35614 | unknown protein                                          | -1.8 | -1.3 | -1.7 |
| 30.5      | At3g16130 | ROPGEF13; Rho guanyl-nucleotide exchange factor          | -1.5 | -1.9 | -1.5 |
| 4.1.6     | At5g28917 | pseudogene                                               | -1.3 | -2.3 | -1.5 |
| 26.6      | At3g53140 | O-diphenol-O-methyl transferase, putative                | -1.0 | -2.8 | -1.3 |
| 26.18     | At5g50040 | invertase/pectin methylesterase inhibitor family protein | -1.3 | -2.8 | -1.0 |
| 35.1      | At2g32870 | meprin and TRAF homology domain-containing protein       | -2.2 | -2.0 | -1.1 |
| 35.2      | At2g15840 | pseudogene, hypothetical protein                         | -1.4 | -1.8 | -2.1 |
| 35.2      | At1g43415 | unknown protein                                          | -1.5 | -2.8 | -1.1 |
| 35.2      | At1g55370 | NDF5   carbohydrate binding / catalytic                  | -1.2 | -2.8 | -1.5 |
| 9.1.1     | At5g44140 | ATPHB7 (PROHIBITIN 7)                                    | -1.0 | -3.1 | -1.4 |
| 20.1.7.12 | At3g05730 | defensin-like (DEFL) family protein                      | -1.1 | -3.8 | -1.0 |
| 26.10     | At5g35715 | CYP71B8   CYP71B8                                        | -1.7 | -3.8 | -1.3 |
| 35.1      | At2g03972 | pseudogene of heat shock protein                         | -3.4 | -2.0 | -1.5 |
| 35.2      | At3g10116 | unknown protein                                          | -1.6 | -2.1 | -3.3 |

|             |           |                                                         |      |      |      |
|-------------|-----------|---------------------------------------------------------|------|------|------|
| 20.1.7      | At5g43740 | disease resistance protein (CC-NBS-LRR class), putative | -3.7 | -1.3 | -2.0 |
| 17.6.3      | At1g22690 | gibberellin-responsive protein, putative                | -4.1 | -1.8 | -1.1 |
| 35.2        | At4g20520 | RNA binding / RNA-directed DNA polymerase               | -2.5 | -2.3 | -2.5 |
| 30.2.99     | At4g20650 | molecular_function unknown                              | -2.5 | -1.6 | -3.3 |
| 35.2        | At3g61826 | unknown protein                                         | -1.4 | -4.1 | -2.1 |
| 27.3.6      | At2g34820 | basic helix-loop-helix (bHLH) family protein            | -2.9 | -3.6 | -1.2 |
| 35.2        | At5g36770 | unknown protein                                         | -1.4 | -4.5 | -2.1 |
| 29.5.11.4.2 | At5g41450 | zinc finger (C3HC4-type RING finger) family protein     | -4.8 | -2.2 | -1.6 |
| 35.2        | At5g06755 | unknown protein                                         | -3.5 | -3.4 | -1.7 |
| 20.1        | At4g09940 | avirulence-responsive family protein                    | -3.2 | -4.2 | -1.2 |
| 35.1        | At1g10717 | Maternally expressed gene (MEG) family protein          | -3.9 | -3.8 | -1.1 |
| 35.2        | At4g08874 | unknown protein                                         | -6.0 | -2.9 | -1.9 |
| 35.2        | At1g53480 | Symbols: ATMRD1, MRD1                                   | -1.9 | -3.2 | -6.1 |
| 17.1.1      | At2g36020 | HVA22J (HVA22-LIKE PROTEIN J)                           | -4.2 | -7.1 | -2.2 |

**Table S3.** Primers used in this study

***GAPDH:***

LP: GAGCTGACTACGTTGTTGAG  
RP: GGAGACAATGTCAAGGTCGG

***WRKY6 (Salk line):***

LP: GAACGTATTAGCCAATCACGC  
RP: TGTGGACGTGTCATAATTTGG

***whWRKY6***

LP: GTTGTTTCCTTCGCCGTCGTGG  
RP: ATGGACAGAGGATGGTCTGGTC

***PHO1***

LP: AGACAACCGGGTGTTACTTCTTGG  
RP: GTCCCACCATCTCCTTACACATTG

***EF-H***

LP: CGCAGAATACAAGGAGGCC  
RP: CGTATCGTAGCTCGCCTGC

***AT2G32830***

LP: AGCCAAAACGCAGATGTACC  
RP: AAGGCCACACCATTAACAGC

***AT4G08878***

LP: CCGAAAACCGTCATGGTAAC  
RP: TTGCATAGCAAAAACCGATG

***AT1G08090***

LP: GAACTTTGGATCAGGGCTCA  
RP: AAGAACATGCTTCCCCATTG

***AT1G08100***

LP: GACATTGGAAACGCTGGAGT  
RP: CACGAAGCTCATGGAGAACA

***AT5g44430***

LP: CTTGTGTGCTGGGAAGACATA  
RP: AGCACAGAAGTTGTGCGAGAA

***At5g30500***

LP: TCCCTTCGACGTACAACCTC  
RP: TCTCGGTCCATATGCTCCTC

***AT5G62850***

LP: CGACAGTCTCCTCGTCATCA  
RP: CCACCGCCATGAATATTACC

***AT1G01980***

LP: CCAACCCTACGTGCCTACAT  
RP: GCGAGTCTTGAGCTGGAAGT

***AT2G19425***

LP: AACGAAGGCGACAGAAGAGA  
RP: GAGAGCAGGAGACAAGAAGAGAG

***AT5G61070***

LP: GATGGAGAACTGGAGGCAAG  
RP: GCTCCTGCTGCAAACCTCTCT

***AT1G02550***

LP: TCGTCTCAATCCTCCCCTC  
RP: GGCGTTGACTTATCCACGAT

***AT5G52300***

LP: TGCAGAGGAAGGAAAAGGTG  
RP: ATCCGAAAACCCCATAGTCC

**Table S4.** Microarray validation with Real-time PCR

|                  | <b>RT PCR</b> | <b>Microarray</b> |
|------------------|---------------|-------------------|
| <b>At5g62850</b> | 4.3 ± 0.01    | 4.7               |
| <b>At1g01980</b> | 3.6 ± 0.7     | 4.2               |
| <b>At2g19425</b> | 2.2 ± 0.3     | 2.4               |
| <b>At5g61070</b> | 1.8 ± 0.6     | 1.9               |
| <b>At1g08090</b> | 1.4 ± 0.1     | 1.1               |
| <b>At1g08100</b> | 1.5 ± 0.02    | 1.1               |
| <b>At5g30500</b> | 2.5 ± 0.2     | 2.9               |
| <b>At4g08878</b> | 1.8 ± 0.4     | 1.9               |
| <b>At5g44430</b> | 1.2 ± 0.5     | 1.7               |
| <b>At2g32830</b> | 1.4 ± 0.08    | 1.6               |
